# Supplementary material for: An experimental model of Braak’s pretangle proposal for the origin of Alzheimer’s disease: the role of locus coeruleus in early symptom development
Source: PubMed Central journal article supplement (PMC6607586; doi:10.1186/s13195-019-0511-2), 2019-07-03
Supplement: 13195_2019_511_MOESM2_ESM.pdf [file 13195_2019_511_MOESM2_ESM.pdf]

## Additional File 2

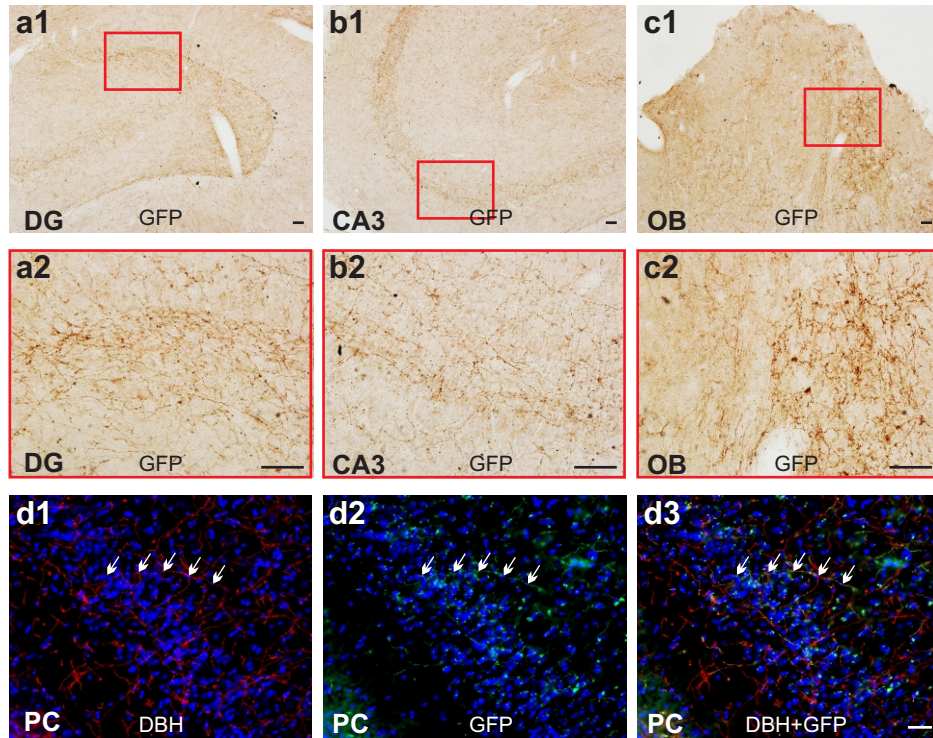

### **Locus coeruleus httauE14-GFP axonal projections 3 months post-infusion**

GFP fibers were observed in the dentate gyrus (DG; **a1-a2**), hippocampal CA3 (**b1-b2**), olfactory bulb (OB; **c1-c2**), and piriform cortex (PC; **d1-d3** showing co-labeling of DBH fiber (d1&d3, red) and GFP fiber (d2&d3, green), indicated by arrows). Scale bars, 50  $\mu\text{m}$ .
