# Supplementary material for: An experimental model of Braak’s pretangle proposal for the origin of Alzheimer’s disease: the role of locus coeruleus in early symptom development
Source: PubMed Central journal article supplement (PMC6607586; doi:10.1186/s13195-019-0511-2), 2019-07-03
Supplement: 13195_2019_511_MOESM3_ESM.pdf [file 13195_2019_511_MOESM3_ESM.pdf]

## Additional File 3

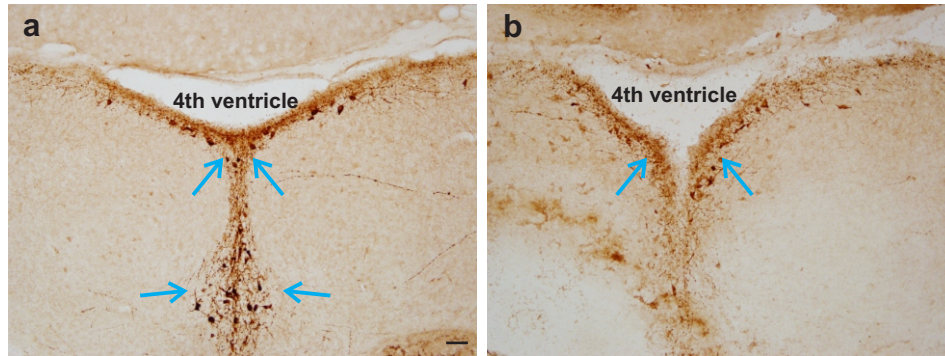

### **Tryptophan hydroxylase (TPH) expression in the brain stem**

**a-b.** Examples of TPH staining of raphe neurons at the level of the 4<sup>th</sup> ventricle. Arrows indicate areas of TPH<sup>+</sup> cells. Scale bar, 50  $\mu$ m.
