# Supplementary material for: An experimental model of Braak’s pretangle proposal for the origin of Alzheimer’s disease: the role of locus coeruleus in early symptom development
Source: PubMed Central journal article supplement (PMC6607586; doi:10.1186/s13195-019-0511-2), 2019-07-03
Supplement: 13195_2019_511_MOESM4_ESM.pdf [file 13195_2019_511_MOESM4_ESM.pdf]

## Additional File 4

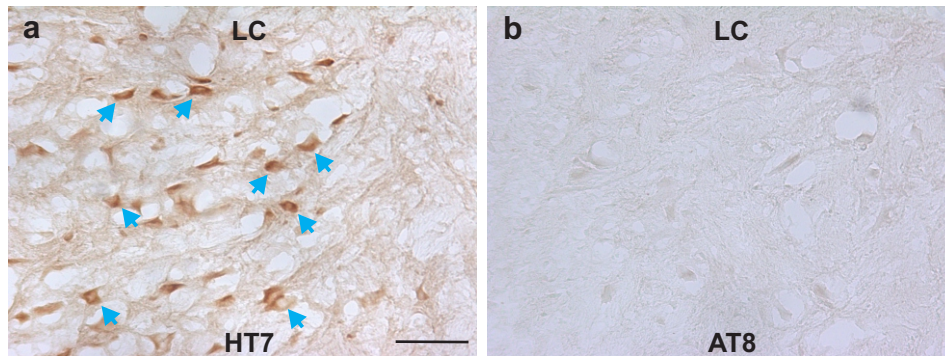

**AT8 antibody failed in htauE14 pseudophosphorylated tau tissue despite human tau expression indexed by HT7**

**a.** An example of HT7 staining in the locus coeruleus (LC) of a TH-CRE rat 3-weeks following htauE14-AAV infusion. Arrows indicate HT7<sup>+</sup> cells. **b.** An adjacent LC slice showing no AT8 staining. Scale bar, 50  $\mu$ m.
