# Supplementary material for: An experimental model of Braak’s pretangle proposal for the origin of Alzheimer’s disease: the role of locus coeruleus in early symptom development
Source: PubMed Central journal article supplement (PMC6607586; doi:10.1186/s13195-019-0511-2), 2019-07-03
Supplement: 13195_2019_511_MOESM6_ESM.pdf [file 13195_2019_511_MOESM6_ESM.pdf]

## Additional File 6

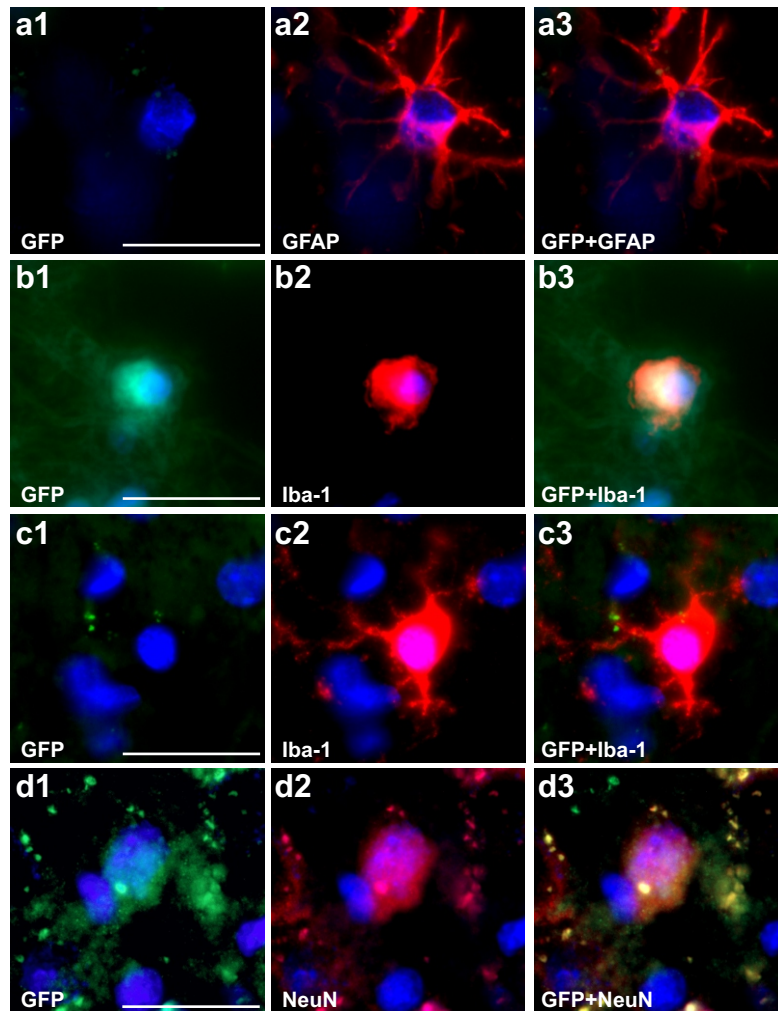

### Neurons and microglia, but not astrocytes, show uptake of htauE14

**a1-a3.** An example of GFAP labeling in the old rat brain as in Figure 6. **b1-b3.** A GFP and Iba-1 double labeled cell. **c1-c3.** An example of an Iba-1 stained microglia in a young htauE14 rat in the same region as in **b**. Note retracted morphology of Iba-1 cell in **b** compared to **c**. **d1-d3.** A GFP and NeuN double labeled cell in the old rat brain. Scale bars, 25  $\mu$ m.
